# Supplementary material for: Whiskers in the city: Domestic cat predation in Ecuadorian coastal cities and associated factors
Source: Research Square preprint supplement (doi:10.21203/rs.3.rs-4271971/v1), 2024-04-19
Supplement: Supplementary file 1 [file 419721c7f23f9a78d026283f.docx]

**Urban Ecosystems**

**Whiskers in the city: Domestic cat predation in Ecuadorian coastal cities and associated factors**

**SUPPLEMENTARY FIGURES**

**Kevin Panchana1, Ileana Herrera1,2*, Anahí Vargas1, Isac Mella-Méndez3, Rafael Flores-Peredo3**

1Escuela de Ciencias Ambientales, Universidad Espíritu Santo, 091650, Guayaquil, Ecuador

2Instituto Nacional de Biodiversidad (INABIO), 170501, Quito, Ecuador

3Laboratorio de Ecología, Instituto de Investigaciones Forestales, Universidad Veracruzana, 91090, Xalapa, México

*Corresponding author: herrera.ita@gmail.com


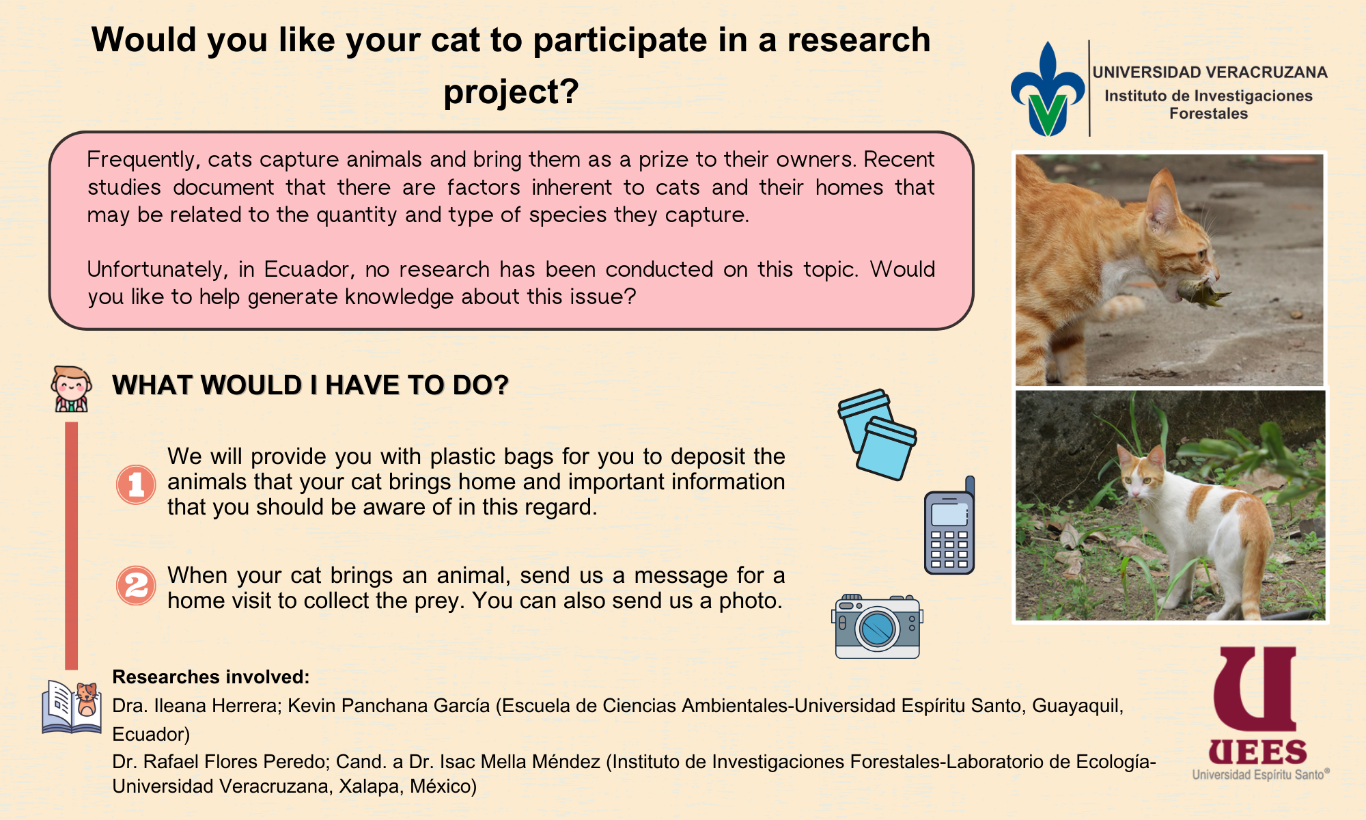
**Fig. S1.** Research project descriptive sheet provided to the participants**.**

**
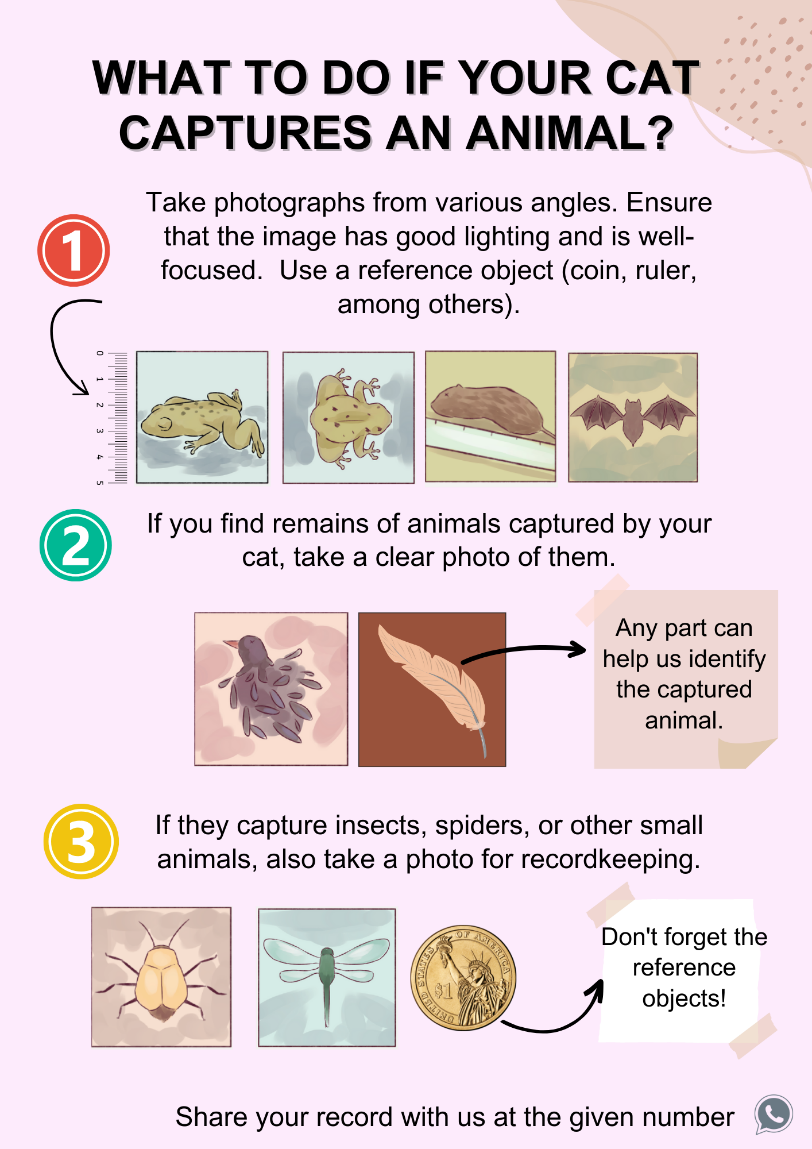
**

**Fig. S2.** Brief guide for photographing animals captured by cats shared with the participants.

**
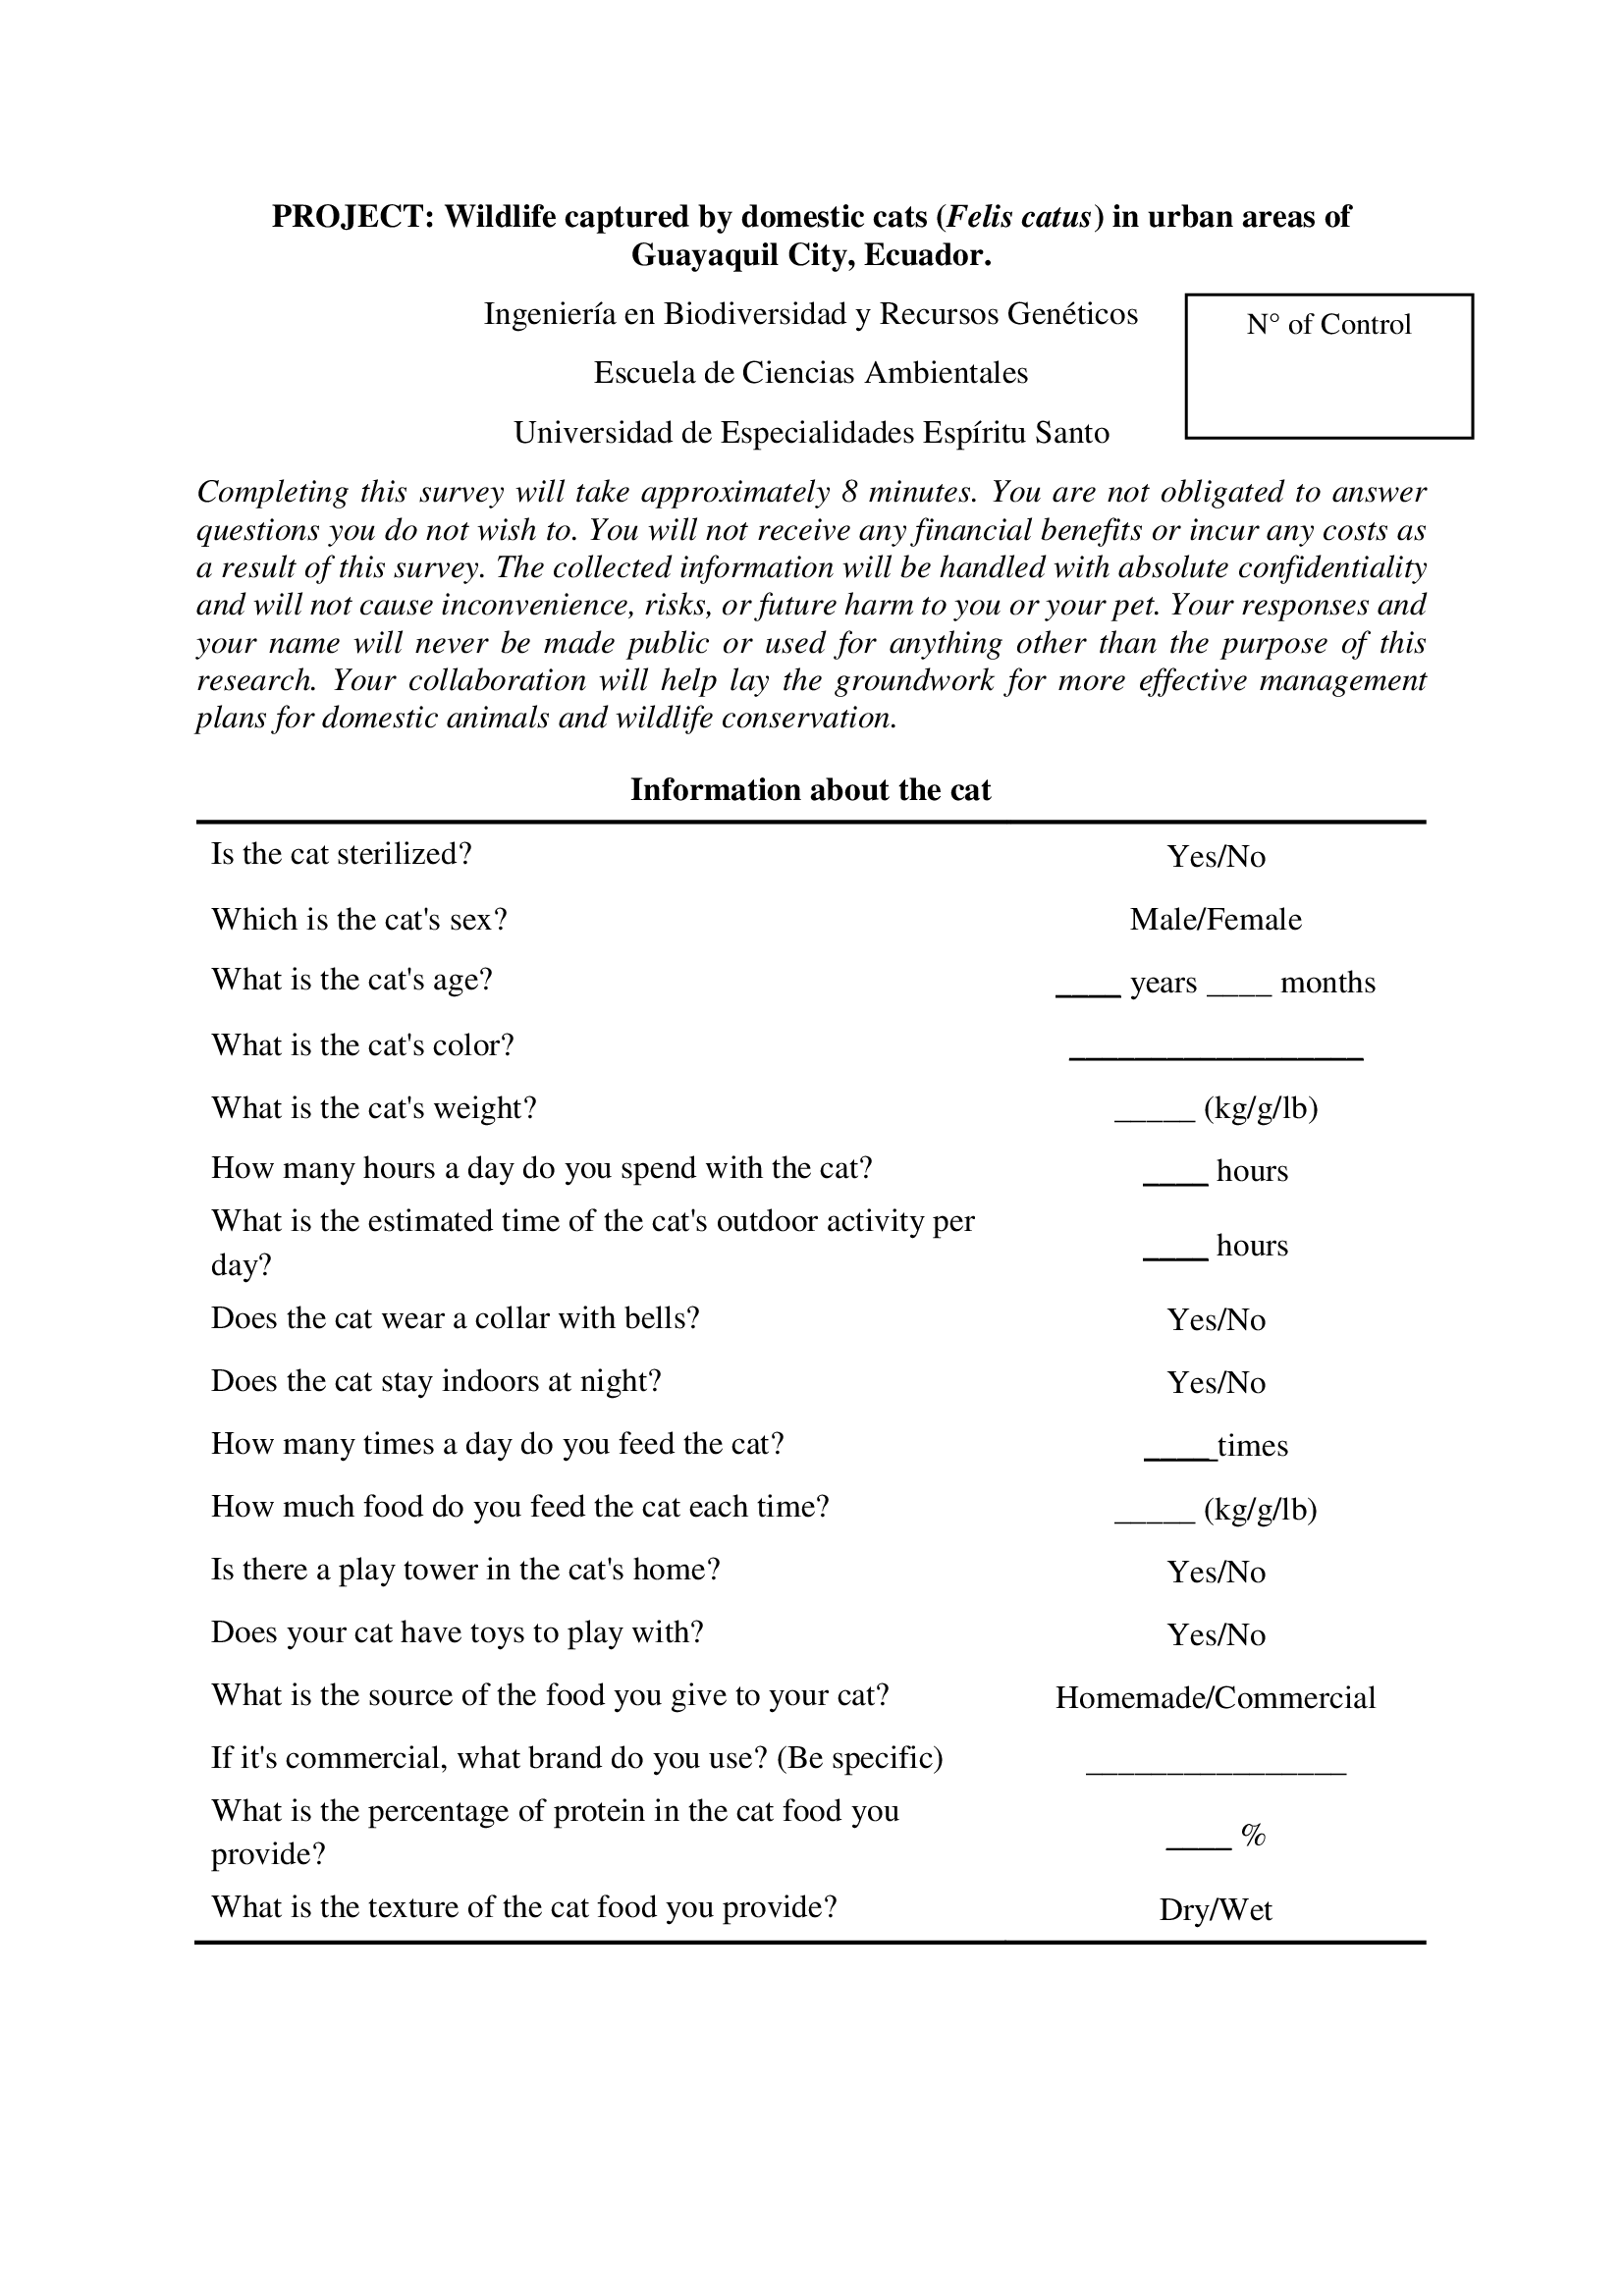
**

**Fig. S3.** Structure of the survey conducted with participants to gather information on the intrinsic and extrinsic factors of the cats.
