# Supplementary material for: Whiskers in the city: Domestic cat predation in Ecuadorian coastal cities and associated factors
Source: Research Square preprint supplement (doi:10.21203/rs.3.rs-4271971/v1), 2024-04-19
Supplement: Supplementary file 2 [file a9cf01ccd635aefdaa9aa71f.xlsx]

## Sheet: Table S1
Urban Ecosystems
Whiskers in the city: Domestic cat predation in Ecuadorian coastal cities and associated factors
Kevin Panchana1, Ileana Herrera1,2*, Anahí Vargas1, Isac Mella-Méndez3, Rafael Flores-Peredo3
1Escuela de Ciencias Ambientales, Universidad Espíritu Santo, 091650, Guayaquil, Ecuador
2Instituto Nacional de Biodiversidad (INABIO), 170501, Quito, Ecuador
3Laboratorio de Ecología, Instituto de Investigaciones Forestales, Universidad Veracruzana, 91090, Xalapa, México
*Corresponding author: herrera.ita@gmail.com
Table S1. Taxa and observed frequency percentages of prey captured by domestic cats (n = 132) in the study area.
Taxonomic group	Taxa	n	Percentage
Reptilia	Hemidactylus sp.	13	9.85
Reptilia	Anolis sagrei	12	9.09
Reptilia	Gekkonidae	3	2.27
Reptilia	Squamata	3	2.27
Reptilia	Mastigodryas pulchriceps	2	1.52
Reptilia	Coniophanes dromiciformis	1	0.76
Reptilia	Gonatodes caudiscutatus	1	0.76
Reptilia	Iguana iguana	1	0.76
Aves	Columbina buckleyi	5	3.79
Aves	Campylorhynchus fasciatus	1	0.76
Aves	Polioptila bilineata	1	0.76
Aves	Sporophila corvina	1	0.76
Aves	Troglodytes aedon	1	0.76
Aves	Columba livia	1	0.76
Aves	Psittacidae	1	0.76
Amphibia	Leptodactylus sp.	2	1.52
Amphibia	Scinax quinquefasciatus	2	1.52
Amphibia	Leptodactylus melanonotus	1	0.76
Mammalia	Mus musculus	7	5.3
Mammalia	Rattus rattus	2	1.52
Invertebrata	Gryllidae	11	8.33
Invertebrata	Periplaneta sp.	10	7.58
Invertebrata	Erythemis vesiculosa	5	3.79
Invertebrata	Erythrodiplax umbrata	4	3.03
Invertebrata	Pantala flavescens	4	3.03
Invertebrata	Odonata	3	2.27
Invertebrata	Schistocerca sp.	3	2.27
Invertebrata	Blaberus sp.	2	1.52
Invertebrata	Diptera	2	1.52
Invertebrata	Erythrodiplax sp.	2	1.52
Invertebrata	Pycnoscelus surinamensis	2	1.52
Invertebrata	Sphingidae	2	1.52
Invertebrata	Agraulis vanillae	1	0.76
Invertebrata	Camponotus sp.	1	0.76
Invertebrata	Coryphaeschna adnexa	1	0.76
Invertebrata	Deltochilum sp.	1	0.76
Invertebrata	Dythemis sterilis	1	0.76
Invertebrata	Erebidae	1	0.76
Invertebrata	Erinnyis ello	1	0.76
Invertebrata	Geometridae	1	0.76
Invertebrata	Gynacantha sp.	1	0.76
Invertebrata	Leucothyreus sp.	1	0.76
Invertebrata	Melanchroia chephise	1	0.76
Invertebrata	Mutillidae	1	0.76
Invertebrata	Myrmeleontidae	1	0.76
Invertebrata	Phasmatodea	1	0.76
Invertebrata	Tholymis citrina	1	0.76
Invertebrata	Tramea darwini	1	0.76
Invertebrata	Unidentified	1	0.76
Invertebrata	Diplopoda	1	0.76
Invertebrata	Lumbricus terrestris	1	0.76
Invertebrata	Scolopendromorpha	1	0.76
Invertebrata	Spirobolida	1	0.76
Total		132	100

## Sheet: Table S2
Urban Ecosystems
Whiskers in the city: Domestic cat predation in Ecuadorian coastal cities and associated factors
Kevin Panchana1, Ileana Herrera1,2*, Anahí Vargas1, Isac Mella-Méndez3, Rafael Flores-Peredo3
1Escuela de Ciencias Ambientales, Universidad Espíritu Santo, 091650, Guayaquil, Ecuador
2Instituto Nacional de Biodiversidad (INABIO), 170501, Quito, Ecuador
3Laboratorio de Ecología, Instituto de Investigaciones Forestales, Universidad Veracruzana, 91090, Xalapa, México
*Corresponding author: herrera.ita@gmail.com
Table S2. Set of GLMMs with Δ AICc < 2 exploring the effect of intrinsic and extrinsic factors on prey capture rates. The variables considered include factors like the presence of a collar with a bell, the availability of cat toys, the presence of green areas within the cat's influence zone, the time spent with the owner, the use of commercial cat food, nocturnal confinement, the size of the near…
Model	df	logLik	AICc	Δ AICc	Akaike weight
Age + Confinement + Toys	5	-135.593	281.824	0	0.15096
Age + Confinement + Toys + Color	6	-134.851	282.605	0.781648	0.102124
Age + Confinement + Toys + Time	6	-134.86	282.623	0.799798	0.101202
Age + Confinement + Toys + Size	6	-135.018	282.938	1.11502	0.0864444
Age + Confinement + Toys + Collar	6	-135.02	282.943	1.11941	0.0862551
Age + Confinement + Toys + Color + Time	7	-133.909	283.034	1.21088	0.0823989
Age + Confinement + Toys + Time + Size	7	-133.963	283.144	1.32073	0.0779951
Age + Confinement + Toys + Color + Time + Size	8	-132.928	283.439	1.61569	0.0673004
Age + Confinement + Toys + Color + Collar	7	-134.125	283.468	1.64436	0.0663427
Age + Confinement + Toys + Influence	6	-135.302	283.507	1.68323	0.0650657
Age + Confinement + Toys + Color + Size	7	-134.267	283.752	1.92863	0.0575526
Age + Confinement + Toys + Commercial	6	-135.445	283.794	1.97051	0.0563599
Null	98	-146.058	296.239	14.4154	2.10117e-05
